# Supplementary material for: The Nav channel bench series: Plasmid preparation
Source: PubMed Central journal article supplement (PMC4472833; doi:10.1016/j.mex.2014.01.002), 2014-02-01
Supplement: mmc1.pdf [file mmc1.pdf]

**Table 1: Na<sub>v</sub>1.1 sequencing primers.**

| Name                          | 5' - Sequence - 3'    | Length (Bases) |
|-------------------------------|-----------------------|----------------|
| <b>hNav1.1-620F</b>           | TGGACCTGGGCAATGTCTCG  | 20             |
| <b>hNav1.1-1017</b>           | CTCTGATGCAGGCCAATGTC  | 20             |
| <b>hNav1.1-1467F</b>          | GAGTTCCAAGAGTGCTAAGG  | 20             |
| <b>hNav1.1-1734F</b>          | AGGGCGAGCAAAGGATGTGG  | 20             |
| <b>hNav1.1-1833R</b>          | GGGCACAAACAAGGAATCTC  | 20             |
| <b>hNav1.1-2316F</b>          | GGCCATCACCATCTGTATTG  | 20             |
| <b>hNav1.1-3046F</b>          | GTGGATAGGATGCACAAAGG  | 20             |
| <b>hNav1.1-3607F</b>          | CAATGGTGGAACTGAGAAG   | 20             |
| <b>hNav1.1-4337F</b>          | ATGTGGAACCTCCAGCCTAAG | 20             |
| <b>hNav1.1-4896F</b>          | TACCTGTTCGAGTGATCC    | 20             |
| <b>hNav1.1-5442F</b>          | GTTTGATCCCGATGCAACTC  | 20             |
| <b>hNav1.1-6356R (3' UTR)</b> | TGGATCTCCATTCGCCATTC  | 20             |

Primer identifiers are made up of the protein name and a numeral that stands for the primer's first 5' base with respect to the open reading frame position. The letters "F" and "R" indicate forward and reverse priming, respectively. The tables in this article do not claim to be comprehensive and serve only as recommendations. Regions that have proven to be problematic may be covered by several primers. Upstream sequencing with a vector primer may be necessary where reverse priming of the reading frame 5' end is not provided. Owing to the research focus in our laboratory, we address only select human Na<sub>v</sub> channels (Na<sub>v</sub>1.1, Na<sub>v</sub>1.2, Na<sub>v</sub>1.4, Na<sub>v</sub>1.5, Na<sub>v</sub>1.6, and Na<sub>v</sub>1.7). Note that, due to sequence similarities between the different Na<sub>v</sub> channels, some of the primers can be used on several different isoforms. For Na<sub>v</sub>1.1, this includes hNav1.2-656F, hNav1.7-2576F, hNav1.7-4802R, and hNav1.2-4972F.

**Table 2: Na<sub>v</sub>1.2 sequencing primers**

| Name                 | 5' - Sequence - 3'   | Length (Bases) |
|----------------------|----------------------|----------------|
| <b>hNav1.2-319R</b>  | GGGTGGCACTGAATCGAGAG | 20             |
| <b>hNav1.2-656F</b>  | TCAGAGTTCTCCGAGCATTG | 20             |
| <b>hNav1.2-783R</b>  | CACGCTTAGACAGAACACAG | 20             |
| <b>hNav1.2-1278F</b> | GGCCTATGAGGAACAGAATC | 20             |
| <b>hNav1.2-1840F</b> | CCGCACAGACATGGAGAACG | 20             |
| <b>hNav1.2-2325F</b> | CATGGCTATGGAGCACTATC | 20             |
| <b>hNav1.2-2863F</b> | GGCCAAACCATGTGCCTTAC | 20             |
| <b>hNav1.2-3420F</b> | ATCTGAAGGCAGCACGGTTG | 20             |
| <b>hNav1.2-3952F</b> | TCCCGTTTGAAGGAATGAG  | 20             |
| <b>hNav1.2-4190R</b> | CTGGCAGTTTGATTGCTCTC | 20             |
| <b>hNav1.2-4535F</b> | CCATACCTCGACCTGCTAAC | 20             |
| <b>hNav1.2-4972F</b> | CCTGCGTTGTTAACATCGG  | 20             |
| <b>hNav1.2-5421F</b> | CGATGCGACCCAGTTTATAG | 20             |

Primers not originally intended but functional for Na<sub>v</sub>1.2 include hNav1.7-4802R and hNav1.1-4896F (Table 6 and 1, respectively).

**Table 3: Nav<sub>v</sub>1.4 sequencing primers**

| Name                 | 5' - Sequence - 3'     | Length (Bases) |
|----------------------|------------------------|----------------|
| <b>hNav1.4-370F</b>  | GCCATCAAGGTGCTCATCC    | 19             |
| <b>hNav1.4-500R</b>  | ATCCCTGTGAAGGTGTACTC   | 20             |
| <b>hNav1.4-855F</b>  | GCCGTTCAACGACACCAACAC  | 21             |
| <b>hNav1.4-1386F</b> | GGAGAAAGAGGAGGAGTTTCAG | 22             |
| <b>hNav1.4-1832F</b> | CTGTGGGCAACCTGGTCTTC   | 20             |
| <b>hNav1.4-2360F</b> | TCATCGGCAATCTTGTGGTC   | 20             |
| <b>hNav1.4-2894F</b> | GCAGCACAGCTGACTACAAG   | 20             |
| <b>hNav1.4-3372F</b> | CATCAAATCCCTGCGGACAC   | 20             |
| <b>hNav1.4-3856F</b> | ACCCTCAACCTCTTCATTGG   | 20             |
| <b>hNav1.4-4332F</b> | CACGCTGTTCGTGTGATCC    | 20             |
| <b>hNav1.4-4894F</b> | ACCCAGTTCATCGCCTACAG   | 20             |
| <b>hNav1.4-5330F</b> | GCAAGATGTATGGCCACGAG   | 20             |

Details as explained in Table Legend 1.

**Table 4: Na<sub>v</sub>1.5 sequencing primers**

| <b>Name</b>          | <b>5' - Sequence - 3'</b> | <b>Length (Bases)</b> |
|----------------------|---------------------------|-----------------------|
| <b>hNav1.5-416F</b>  | GCACCATCCTCACCAACTG       | 20                    |
| <b>hNav1.5-903F</b>  | GGAATCCCTGGACCTTTACC      | 20                    |
| <b>hNav1.5-1402F</b> | CCAGTAAACAGCCATGAGAG      | 20                    |
| <b>hNav1.5-1776F</b> | CAGCACTGTGGACTGCAATG      | 20                    |
| <b>hNav1.5-2443F</b> | GTCTTCAAGCTGGCCAAATC      | 20                    |
| <b>hNav1.5-2923F</b> | CGGACCACCTGGGATTTCTG      | 20                    |
| <b>hNav1.5-3415F</b> | GGCAGCACAGCAGACATGAC      | 20                    |
| <b>hNav1.5-3943F</b> | TCACGATTTGAGGGCATGAG      | 20                    |
| <b>hNav1.5-4444F</b> | GGCCAGGACATCTTCATGAC      | 20                    |
| <b>hNav1.5-4893F</b> | CCGCATCCTCAGACTGATCC      | 20                    |
| <b>hNav1.5-5433F</b> | TTCGGTCCTGTCTGACTTTG      | 20                    |

Details as explained in Table Legend 1.

**Table 5: Nav1.6 sequencing primers**

| <b>Name</b>          | <b>5' - Sequence - 3'</b> | <b>Length (Bases)</b> |
|----------------------|---------------------------|-----------------------|
| <b>hNav1.6-317F</b>  | TTAGTGCCACGCCTGCCTTG      | 20                    |
| <b>hNav1.6-852F</b>  | GCCATAAACTTCAACGAGAGC     | 20                    |
| <b>hNav1.6-1374F</b> | CTCAGAAGATGCCATAGAGG      | 20                    |
| <b>hNav1.6-1918F</b> | AACAGCACGGTGGACTGCAACG    | 22                    |
| <b>hNav1.6-2411F</b> | TCATAGCCATGGATCCCTAC      | 20                    |
| <b>hNav1.6-2900F</b> | TGGTGCTGAACCTGTTTCTG      | 20                    |
| <b>hNav1.6-3393F</b> | CTCTGAAGGAAGCACCATTG      | 20                    |
| <b>hNav1.6-3868F</b> | GGTGCCATAAAGTCCCTTAG      | 20                    |
| <b>hNav1.6-4363F</b> | ACCCTGAACCTGTTCATTGG      | 20                    |
| <b>hNav1.6-4908F</b> | GATTCGTACCCTGCTCTTG       | 20                    |
| <b>hNav1.6-5412F</b> | GTAAGCTGGCAGAC            | 19                    |

Details as explained in Table Legend 1.

**Table 6: Na<sub>v</sub>1.7 sequencing primers**

| Name                 | 5' - Sequence - 3'   | Length (Bases) |
|----------------------|----------------------|----------------|
| <b>hNav1.7-680R</b>  | ACAGAAATAGTTTTCAAAGC | 20             |
| <b>hNav1.7-707F</b>  | GGGCTTTGATCCAGTCAGTG | 20             |
| <b>hNav1.7-1029R</b> | GCTCGGTAGCCATAATCAG  | 20             |
| <b>hNav1.7-1359F</b> | CAGAATTATGGGCCTCTCAG | 20             |
| <b>hNav1.7-2095F</b> | TGTCCACCTTGGTGGTACAG | 20             |
| <b>hNav1.7-2276R</b> | TCAGTCATTGGGTGGTGTTT | 20             |
| <b>hNav1.7-2576F</b> | TGTTGGCCATCATCGTCTTC | 20             |
| <b>hNav1.7-4038F</b> | ACGGTTTCCTGCAAGTCAAG | 20             |
| <b>hNav1.7-4222R</b> | CAGAATCCACTGCTGCATAC | 20             |
| <b>hNav1.7-4228F</b> | GTAGACAAGCAGCCAAA    | 18             |
| <b>hNav1.7-4802R</b> | ATCACTCGGAACAGGGTAGG | 20             |

Details as explained in Table Legend 1. Primers not originally intended but functional for Na<sub>v</sub>1.7 include hNav1.1-4896F (Table 1) as well as hNav1.2-4972F and hNav1.2-5421F (Table 2).
